# Supplementary material
Source: PubMed Central journal article supplement (PMC4493763)
Supplement: NIHMS704515-supplement-suppl.pdf [file NIHMS704515-supplement-suppl.pdf]

# Distribution and Dynamics of Chromatin Modification Induced by a Defined DNA Double Strand Break

Robert Shroff, Ayelet Arbel-Eden, Duane Pilch, Grzegorz Ira, William M. Bonner, John H. Petrini, James E. Haber, and Michael Lichten

## Supplemental Experimental Procedures

### Culture Conditions for *HO* Induction

For *HO* induction in growing cultures, cells were grown to  $0.5 - 10^7$  cells/ml in YEPL broth [S3] with vigorous aeration. A 10 ml sample was collected, D-galactose (Sigma, 20% w/v) was added (final concentration, 2% w/v), and  $\leq 10$  ml samples were collected at appropriate times. For induction of *HO* in G1-arrested cultures, *bar1* strains were grown to  $0.5 \times 10^7$  cells/ml in YEPL broth,  $\alpha$ -mating pheromone (Sigma) was added to a final concentration of 200 nM, and cells were incubated for 3 hr, at which point  $>95\%$  of cells were unbudded schmoos. *HO* was then induced as above.

### Chromatin Immunoprecipitation

ChIP was performed as described [S4], with the following changes. Lysis buffer contained 1 M NaCl to help block reassociation of free histones with DNA. Cells were agitated for 5 min with glass beads in a Mini-Bead Beater-8 (Bio Spec). Lysates were sonicated to an average fragment size of 0.5 kb. Primary antibodies were against  $\gamma$ -H2AX [S5], Mre11p [S6], and the HA epitope (monoclonal antibody 12CA5, Roche). Later experiments used rabbit polyclonal antiserum against the yeast-specific phosphopeptide, with no significant change in relative ChIP ratios. Immunocomplexes were bound to immobilized Protein G (Pierce), washed five times in lysis buffer with 1 M NaCl, three times with lysis buffer with 0.5 M NaCl, and twice with the final wash as described [S4], and were eluted in 10 mM Tris and 1 mM EDTA (pH 8.0). Eluates were incubated at 65°C for  $\geq 6$  hr and then at 95°C for 20 min to dissociate cross-linked protein from DNA. Genomic DNA was prepared as described [S7]. All samples for a given experiment were processed in parallel.

### PCR and Data Analysis

One to ten percent of each immunoprecipitate or 250 pg of purified DNA was used in multiplex PCR reactions containing two primer pairs: a pair specific to a sequence of interest near *MAT* and a control pair specific to *YCL011c* (Table S2). PCR reactions contained

50 mM KCl, 10 mM Tris-HCl (pH 9.0 at 25°C), 0.1% Triton X-100, 25 mM MgCl<sub>2</sub>, 200 mM each dNTP, 25 pM each oligonucleotide, and 2.5 units of Taq polymerase (Promega). PCR reactions were 25 cycles of: 95°C, 15 s; 55°C, 15 s; 72°C, 30 s. Products were displayed on 10% polyacrylamide gels, stained with SYBR Green 1 (Molecular Probes), imaged on a Fuji LAS1000 imaging system, and quantified with Image Gauge V4.0 (Fuji).

### DSB Analysis

DNA samples were digested with SspI (New England Biolabs) and displayed on alkaline agarose gels as described [S8]. Gel blots were probed with a single-strand probe complementary to the unresected DSB strand, prepared by single-primer linear amplification [S7] with primer 7 (Table S2) and a PCR product (with primer 7 and HO-R, 5'-GAAACACCAAGGGAGAGAAGAC-3'). This probe contains sequences 20–715 nucleotides to the right of the HO-cut site. Blot radioactivity was detected with a Fuji BAS2000 phosphorimager and quantified with ImageGauge 4.0 software (Fuji).

### Supplemental References

- Lee, S.E., Pellicoli, A., Demeter, J., Vaze, M.P., Gasch, A.P., Malkova, A., Brown, P.O., Botstein, D., Stearns, T., Foiani, M., et al. (2000). Arrest, adaptation, and recovery following a chromosome double-strand break in *Saccharomyces cerevisiae*. *Cold Spring Harb. Symp. Quant. Biol.* 65, 303–314.
- Wang, X., and Haber, J.E. (2004). Role of *Saccharomyces* single-stranded DNA-binding protein RPA in the strand invasion step of double-strand break repair. *PLoS Biol* 2(1): e21 DOI: 10.1371/journal.pbio.0020021.
- Rudin, N., and Haber, J.E. (1988). Efficient repair of HO-induced chromosomal breaks in *Saccharomyces cerevisiae* by recombination between flanking homologous sequences. *Mol. Cell. Biol.* 8, 3918–3928.
- Strahl-Bolsinger, S., Hecht, A., Luo, K., and Grunstein, M. (1997). *SIR2* and *SIR4* interactions differ in core and extended telomeric heterochromatin in yeast. *Genes Dev.* 11, 83–93.
- Rogakou, E.P., Boon, C., Redon, C., and Bonner, W.M. (1999). Megabase chromatin domains involved in DNA double-strand breaks in vivo. *J. Cell Biol.* 146, 905–916.
- Usui, T., Ogawa, H., and Petrini, J.H. (2001). A DNA damage response pathway controlled by Tel1 and the Mre11 complex. *Mol. Cell* 7, 1255–1266.
- Liu, J., Wu, T.C., and Lichten, M. (1995). The location and structure of double-strand DNA breaks induced during yeast meiosis: evidence for a covalently linked DNA-protein intermediate. *EMBO J.* 14, 4599–4608.
- White, C.I., and Haber, J.E. (1990). Intermediates of recombination during mating type switching in *Saccharomyces cerevisiae*. *EMBO J.* 9, 663–673.

Table S1. Yeast Strains

| Strain Name | Relevant Genotype                                                       |
|-------------|-------------------------------------------------------------------------|
| JKM179 [S1] | <i>MAT<math>\alpha</math></i>                                           |
| CY3265      | <i>MAT<math>\alpha</math> dun1::KAN</i>                                 |
| YAA2        | <i>MAT<math>\alpha</math> chk1::KAN</i>                                 |
| JKM187      | <i>MAT<math>\alpha</math> mre11::hisG</i>                               |
| YAA25       | <i>MAT<math>\alpha</math> sml1::KAN mec1::NAT</i>                       |
| H987        | <i>MAT<math>\alpha</math> tel1::URA3</i>                                |
| YAA45       | <i>MAT<math>\alpha</math> sml1::KAN mec1::NAT tel1::TRP1</i>            |
| YMV73-3     | <i>MAT<math>\alpha</math> rad53::NAT sml1::KAN</i>                      |
| JKM139 [S2] | <i>MAT<math>\alpha</math></i>                                           |
| H1069       | <i>MAT<math>\alpha</math> HA-6xHis- HTB2-URA3</i>                       |
| yXW1 [S2]   | <i>MAT<math>\alpha</math> bar1::ADE3</i>                                |
| R664        | <i>MAT<math>\alpha</math> bar1::ADE3 tel1::TRP1</i>                     |
| H1073       | <i>MAT<math>\alpha</math> bar1::ADE3 mre11::hisG</i>                    |
| H1081       | <i>MAT<math>\alpha</math> bar1::ADE3 sml1::KAN mec1::NAT</i>            |
| H1132       | <i>MAT<math>\alpha</math> bar1::ADE3 sml1::KAN tel1::TRP1 mec1::NAT</i> |

All strains are *ho hml::ADE1 leu2-3, 112 hmr::ADE1 ade1 lys5 trp1::hisG ura3-52 ade3::GAL10::HO*. Parent strains are underlined; derivatives are indented. H1069 contains an HA-6xHis immunotag fused in-frame to the HTB2 N-terminus and the URA3 gene inserted in noncoding sequences 3' to HTB2 (gift from Namrita Dhillon).

Table S2. PCR Primers

| Primer Name | Sequence                         | kb from <i>MAT</i> DSB |
|-------------|----------------------------------|------------------------|
| a. 25       | 5'-GTATCACGAGCCCATCTCCAATAG-3'   |                        |
| b. 26       | 5'-CATCCCTCACCAAGGAAGAAAGAG-3'   | -46.37                 |
| a. 23       | 5'-CTCTTTCTCCTTGGTGAGGGATG-3'    |                        |
| b. 24       | 5'-GTTGTGTCCTTAGTTAGGTTTCAGCG-3' | -40.44                 |
| a. 19       | 5'-TCGTCGTCGCCATCATTTTC-3'       |                        |
| b. 20       | 5'-GCCCAAGTTTGAGAGAGGTTGC-3'     | -29.61                 |
| a. 17       | 5'-GGAGTCAGATGGAAGTGGGTAAC-3'    |                        |
| b. 18       | 5'-TGCCCGTAAGTGAAGGAAGTCG-3'     | -23.04                 |
| a. 15       | 5'-CGTCTTCTCAGCGAACACACG-3'      |                        |
| b. 16       | 5'-GCAATAACCCACGGAAACACTG-3'     | -16.44                 |
| a. 13       | 5'-TCAGGGTCTGGTGAAGGAATG-3'      |                        |
| b. 14       | 5'-CAAAGGTGGCAGTTGTTGAACC-3'     | -9.32                  |
| a. 1        | 5'-ATTGCGACAAGGCTTCAACC-3'       |                        |
| b. 2        | 5'-CACATCACAGGTTTATTGGTTCC-3'    | -5.08                  |
| a. 39       | 5'-TGTCGGTAGTGTGAGCAACACG-3'     |                        |
| b. 40       | 5'-CCTGAAATTCAGCATTGCCTC-3'      | -4.18                  |
| a. 3        | 5'-ATTCTGCCATTGAGGACAGCG-3'      |                        |
| b. 4        | 5'-CGTGGGAAAAGTAATCCGATGC-3'     | -3.43                  |
| a. 43       | 5'-CCAGATTTGTATTAGACGAGGGACG-3'  |                        |
| b. 44       | 5'-AAGATGCTGCCGCACAACCTCTCAC-3'  | -1.90                  |
| a. 3-1      | 5'-ATGTCCTGACTTCTTTGACGAGG-3'    |                        |
| b. 4-1      | 5'-ACGACCTATTTGTAACCGCACG-3'     | -1.35                  |
| a. 45       | 5'-CCACATTAATAACCAACCCATCCG-3'   |                        |
| b. 46       | 5'-TAGTGATGAGGAGAAGATTGTTGC-3'   | -0.77                  |
| a. 5'BreakF | 5'-AAGAGTTTGGGTATGTAATATGAG-3'   |                        |
| b. 5'BreakR | 5'-CTGAAACTAAAAGAAAACCCGAC-3'    | -0.01                  |
| a. 7        | 5'-CCTGGTTTTGGTTTTGTAGAGTGG-3'   |                        |
| b. 8        | 5'-GTACAAACACATCTTCCAATA-3'      | 0.02                   |
| a. 49       | 5'-CATGCGGTTACATGACTTTTGAC-3'    |                        |
| b. 50       | 5'-GGAAGTAACCTCTACTGTGGAGGCAC-3' | 0.48                   |
| a. 51       | 5'-TGGACGGAGACTTAATATCGTCAC-3'   |                        |
| b. 52       | 5'-AGGATGCCCTTGTTTTGTTACTG-3'    | 1.02                   |
| a. 9        | 5'-AACGCTCGTCGATCGCCGTTCTAA-3'   |                        |
| b. 10       | 5'-AATGGATTTGCCAAATGCACAT-3'     | 1.81                   |
| a. 53       | 5'-CGGAGTACCATCGTGTTCATGG-3'     |                        |
| b. 54       | 5'-CTGGGTATAAGGCAAGTTCAAGATG-3'  | 2.29                   |
| a. 11       | 5'-GCCGTTTCTCGAAGTCTTGTCCA-3'    |                        |
| b. 12       | 5'-ACGAATGAGTTAGCATGGCACTT-3'    | 2.80                   |
| a. 55       | 5'-CCTCTTCTCTCATCGTCTCAG-3'      |                        |
| b. 56       | 5'-GCAGTTCTGCATCATATTGGTCC-3'    | 3.72                   |
| a. 27       | 5'-CAGGTTTATATCCACCTTCAATCGG-3'  |                        |
| b. 28       | 5'-TTTGGGGCAACAGTAGGCAGTG-3'     | 5.67                   |
| a. 29       | 5'-GCAATCGTGTCAATGTGGTCATC-3'    |                        |
| b. 30       | 5'-GTTTCAGGAGCCCATATCAAC-3'      | 7.77                   |
| a. 31       | 5'-CGTTGTCTTTTCGTTTGGTGTCTG-3'   |                        |
| b. 32       | 5'-GCTCTTGGCCCTGTCTTTGAC-3'      | 12.84                  |
| a. 33       | 5'-GAACCAAACGCCAGCCATTC-3'       |                        |
| b. 34       | 5'-GCCAAAGTAAAGTGTGTACCTTCC-3'   | 21.41                  |
| a. 35       | 5'-TCCAGGCGGGTGTGAAAAAC-3'       |                        |
| b. 36       | 5'-ATGGGGAATACGGAAGTGGGTC-3'     | 29.43                  |
| a. YCR011CF | 5'-CGTTACTTTCTCATCACCTTCGC-3'    |                        |
| b. YCR011CR | 5'-ACAGAGAGAGTGGGCTCATCTTGC-3'   | -65.93                 |

Left-hand and right-hand primers in each pair are labeled "a" and "b." All distances are calculated from the closest point of the PCR product to the HO-cut site in a *MATa* strain. Primers with negative values are between the HO-cut site and *CEN3*. PCR product sizes range from 143 to 204 bp, with the exception of the YCR011CF/YCR011CR (217 bp) and MAT3-1/MAT4-1 (246 bp).
